# Supplementary material for: Reduced Zeb1 Expression in Prostate Cancer Cells Leads to an Aggressive Partial-EMT Phenotype Associated with Altered Global Methylation Patterns
Source: MDPI journal article supplement (doi:10.3390/ijms222312840), 2021-11-27
Supplement: s1 [file s1]

# Reduced *Zeb1* Expression in Prostate Cancer Cells Leads to an Aggressive Partial-EMT Phenotype Associated with Altered Global Methylation Patterns

Jenna Kitz <sup>1</sup>, Cory Lefebvre <sup>1</sup>, Joselia Carlos <sup>2</sup>, Lori E. Lowes <sup>3</sup> and Alison L. Allan <sup>1,4,5,\*</sup>

<sup>1</sup> London Regional Cancer Program, London Health Sciences Centre, Department of Anatomy & Cell Biology, Western University, London, ON, N6A 5W9, Canada; jkitz@uwo.ca (J.K.); clefebvre2019@meds.uwo.ca (C.L.); alison.allan@lhsc.on.ca (A.L.A.)

<sup>2</sup> Department of Medical Biophysics, Western University, London, ON, N6A 5C1, Canada; jcarlos6@uwo.ca

<sup>3</sup> Flow Cytometry, London Health Sciences Centre, London, ON, N6A 5W9, Canada; lori.lowes@lhsc.on.ca

<sup>4</sup> Department of Oncology, Western University, London, ON, N6A 5W9, Canada

<sup>5</sup> Cancer Research Laboratory Program, Lawson Health Research Institute, London, ON, N6C 2R5, Canada

\* Correspondence: alison.allan@lhsc.on.ca; Tel.: +1-519-685-8600 (ext. 55134)

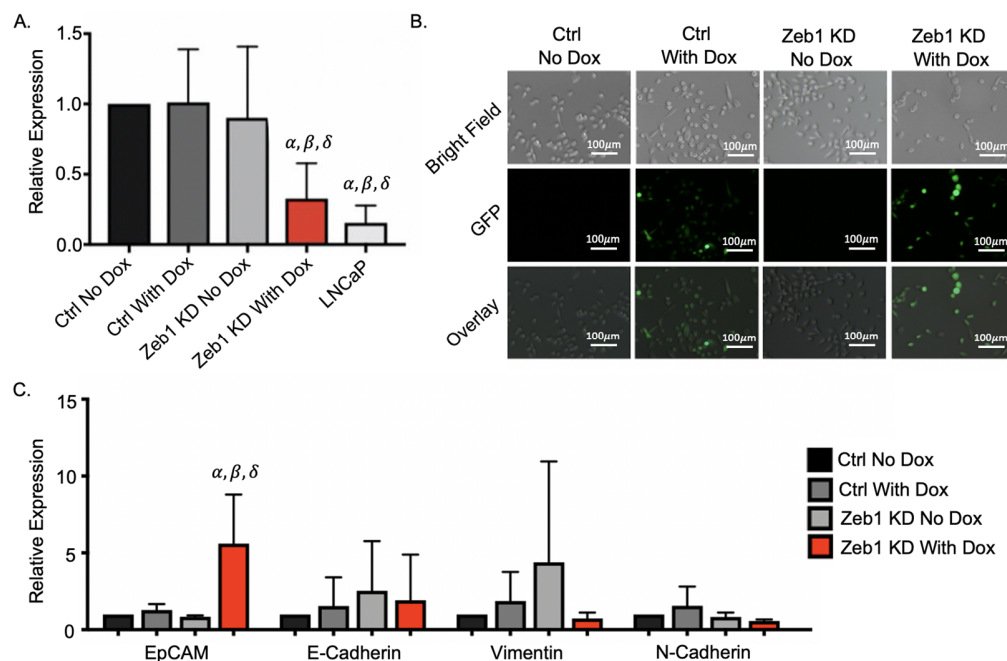

**Supplemental Figure S1.** *Zeb1* RNA can be inducibly knocked down in PC-3 human prostate cancer cells. Mesenchymal human PC-3 prostate cancer cells were engineered to knockdown expression of the master EMT regulator *Zeb1* using the SMARTvector inducible lentiviral shRNA system (Dharmacon), which features Tet-on® induction of the target shRNA in the presence of Doxycycline (Dox). **(A)** qRT-PCR analysis of *Zeb1* mRNA expression in the presence of absence of Dox in *Zeb1*<sup>KD</sup> or Ctrl cells, or LNCaP cells. **(B)** Immunofluorescence of *Zeb1*<sup>KD</sup> and Ctrl cells  $\pm$  Dox. Scale bars = 100  $\mu$ m. **(C)** qRT-PCR analysis of *EpCAM*, *E-Cadherin*, *Vimentin*, and *N-Cadherin* mRNA expression in *Zeb1*<sup>KD</sup> or Ctrl cells  $\pm$  Dox. Data is presented as the mean  $\pm$  SEM (n=3).  $\alpha$ = significantly different than PC-3 Ctrl no Dox.  $\beta$ = significantly different than Ctrl with Dox.  $\delta$ = significantly different than *Zeb1*<sup>KD</sup> no Dox ( $p \leq 0.05$ ).

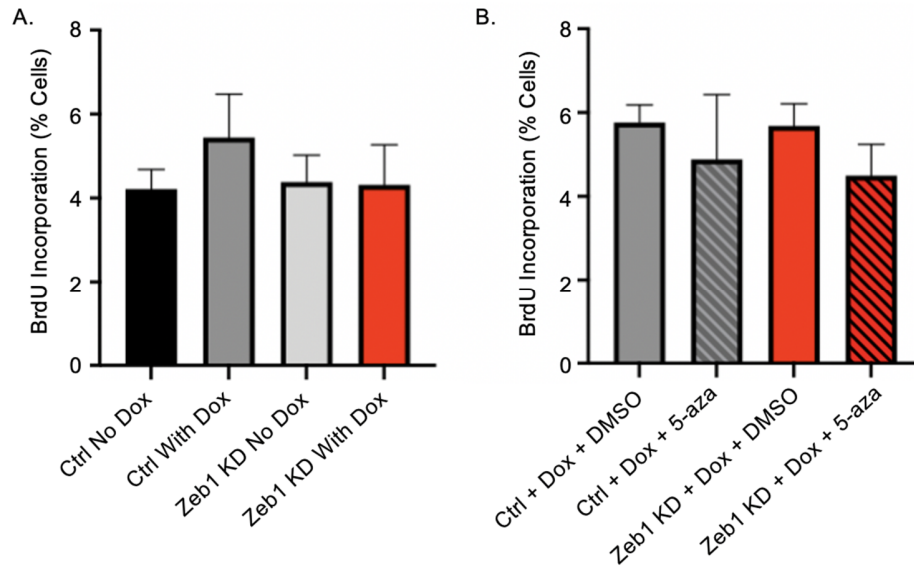

**Supplemental Figure S2.** Knockdown of *Zeb1* in PC-3 prostate cancer cells does not alter cell proliferation. Cells ( $1.6 \times 10^4$ /well) were seeded on 8-well chamber slides with or without Dox, DMSO, and/or 5uM 5-azacytidine (5-aza), a global demethylating agent. Cells were serum starved for 3 days and then treated with media containing fetal bovine serum albumin for 24h. Cells were then treated with BrdU for 30 min and formalin fixed. Cells were incubated with a BrdU antibody overnight and visualized using 5 high-powered fields of view (FOV) using DAPI mounting media. **(A)** BrdU incorporation of Ctrl and Zeb1<sup>KD</sup> cells  $\pm$  Dox. **(B)** BrdU incorporation of Ctrl and Zeb1<sup>KD</sup> cells + Dox  $\pm$  DMSO or 5-aza (5uM). Data is presented as the mean  $\pm$  SEM (n=3).

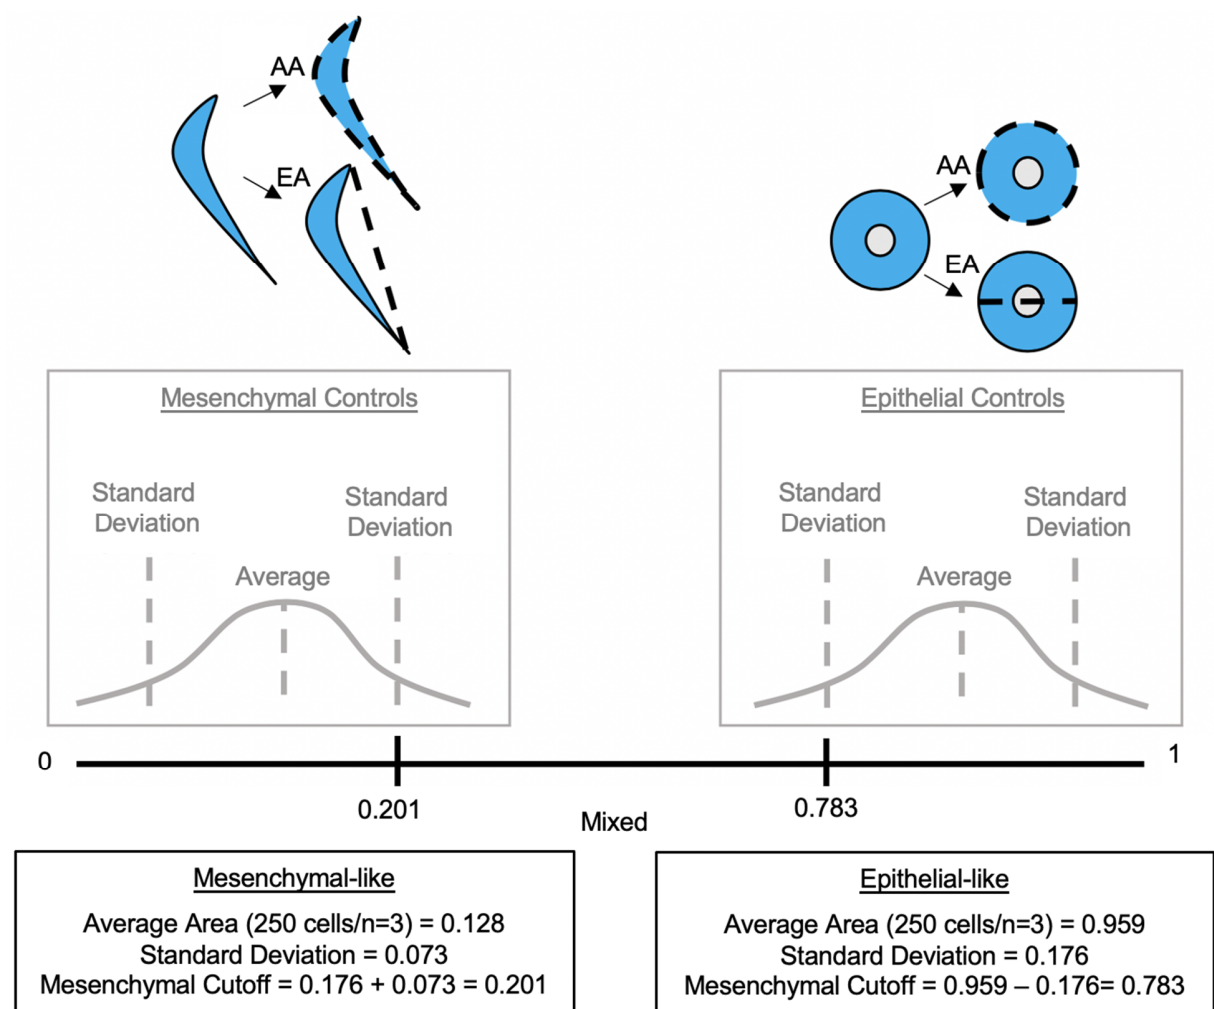

**Supplemental Figure S3:** Cell morphology assay calculations. Epithelial (MDA-MB-468 breast cancer cells) and mesenchymal (primary lung fibroblasts) control cells were assessed for cell shape (250 cells, n=3). The average was calculated and the “cut-off” points for a round (epithelial) cell and an elongated (mesenchymal) cell were calculated by subtracting/adding the standard deviation from/to the average. Zeb1<sup>KD</sup> and Ctrl cells were then analyzed for cell shape (250 cells, n=3). Any value within the mesenchymal “cut-off” (0-0.201) was considered mesenchymal-like, any value within the epithelial “cut-off” (0.783-1) was considered epithelial-like, and any value which fell in between (0.202-0.782) was considered mixed.

**Supplemental Table S1.** Primary antibodies for immunoblotting.

| Target Protein                                           | 1° Host | kDa | 1° Conditions<br>(Overnight @ 4°C) | 2° Conditions<br>(1 hour @ room temperature) | Reduced? | Poly/Mono<br>Clonal |
|----------------------------------------------------------|---------|-----|------------------------------------|----------------------------------------------|----------|---------------------|
| <b>Zeb1</b><br>(Cell Sig.- 3396)                         | Rabbit  | 200 | 1:500                              | 1:1000                                       | Yes      | Mono<br>(D80D3)     |
| <b>EpCAM</b><br>(Abcam- ab32392)                         | Rabbit  | 39  | 1:1000                             | 1:2000                                       | Yes      | Mono<br>(E144)      |
| <b>E-Cadherin</b><br>(BD Biosciences- 610181)            | Mouse   | 120 | 1:2000                             | 1:2000                                       | Yes      | Mono<br>(36)        |
| <b>N-Cadherin</b><br>(Abcam- ab76011)                    | Rabbit  | 100 | 1:1000                             | 1:2000                                       | Yes      | Mono<br>(EPR1791-4) |
| <b>Vimentin</b><br>(Millipore-MAB3400)                   | Mouse   | 60  | 1:1000                             | 1:2000                                       | Yes      | Mono<br>(V9)        |
| <b>P-Cadherin</b><br>(Abcam- ab137729)                   | Rabbit  | 91  | 1:1000                             | 1:2000                                       | Yes      | Poly                |
| <b>Integrin <math>\beta 4</math></b><br>(Abcam- ab29042) | Mouse   | 202 | 1:1000                             | 1:1000                                       | Yes      | Mono<br>(M126)      |
| <b>Actin</b><br>(Sigma- A2006)                           | Rabbit  | 42  | 1:5000                             | 1:5000                                       | Yes      | Poly                |

**Supplemental Table S2.** Forward and reverse primers used for qRT-PCR

| Target Gene                          | Forward Primer (5' → 3') | Reverse Primer (5' → 3')  |
|--------------------------------------|--------------------------|---------------------------|
| <i>Zeb1</i>                          | AGCACTTGTCTTCTGTGTGATG   | CAGGCTTCTCAGCTTCTGCT      |
| <i>EpCAM</i>                         | CGACTTTTGCCGCAGCTCAGGA   | GGGCCCCTTCAGGTTTTGCTCT    |
| <i>E-Cadherin</i>                    | TGCTGATGCCCCCAATACCCCA   | GTGATTTCTTGCCCCACGCCAA    |
| <i>N-Cadherin</i>                    | TGACTCCAACGGGGACTGCACA   | AGCTCAAGGACCCAGCAGTGGA    |
| <i>Vimentin</i>                      | AACCAACGACAAAGCCCCGCGTC  | TTCCGGTTGGCAGCCTCAGAGA    |
| <i>P-Cadherin</i>                    | AAGTGCTGCAGCCAAAGACAGA   | AGGTAGACCCACCTCAATCATCCTC |
| <i>Integrin <math>\beta 4</math></i> | GCTTCACACCTATTTCCCTGTC   | GACCCAGTCCTCGTCTTCTG      |
| <i>GAPDH</i>                         | TCCATGGCACCGTCAAGGCTGA   | GCCAGCATCGCCCCACTTGATT    |
